# Supplementary material for: Preparation, Characterization, and Antitumor Evaluation of Electrospun Resveratrol Loaded Nanofibers
Source: Hindawi journal article supplement (doi:10.1155/2016/5918462), 2016-01-01
Supplement: f1 [file 5918462.f1.doc]

**Supplement materials**

Prepartion, characterization and antitumor evaluation of electrospun Resveratrol loaded nanofibers

**Hui Zhou 1,a, Xiaoxing Liu 2,a, Fenglei Wu 3, Junting Zhang 4, Zhen Wu 4 , Haitao Yin 5,*, Hui Shi 6,***

1 Department of Neurosurgery, Affiliated Lianyungang Hospital of Xuzhou Medical College, Lianyungang, 222000,China

2 Department of Neurosurgery, Jiangsu Taizhou People’s Hospital, Taizhou, 225300, China

3Department of Oncology,Affiliated Lianyungang Hospital of Xuzhou Medical College, Lianyungang, 222000,China

4Department of Neurosurgery, Beijing Tiantan Hospital, Capital Medical University, Beijing, 100050, China

5 Department of Radiotherapy, the Central Hospital of Xuzhou, Affiliated Hospital of Southeast University, Xuzhou, China

a These authors contributed equally to this work.

***** Correspondence: Haitao Yin, Department of Radiotherapy, the Central Hospital of Xuzhou, Affiliated Hospital of Southeast University, Xuzhou, China, Email: [haitaoyin@xzmc.edu.cn](mailto:haitaoyin@xzmc.edu.cn); or Hui Shi, Department of Neurosurgery, Affiliated Lianyungang Hospital of Xuzhou Medical College, Lianyungang 222000,China. E-mail: [shihuilyg@l63.com](mailto:shihuilyg@l63.com)


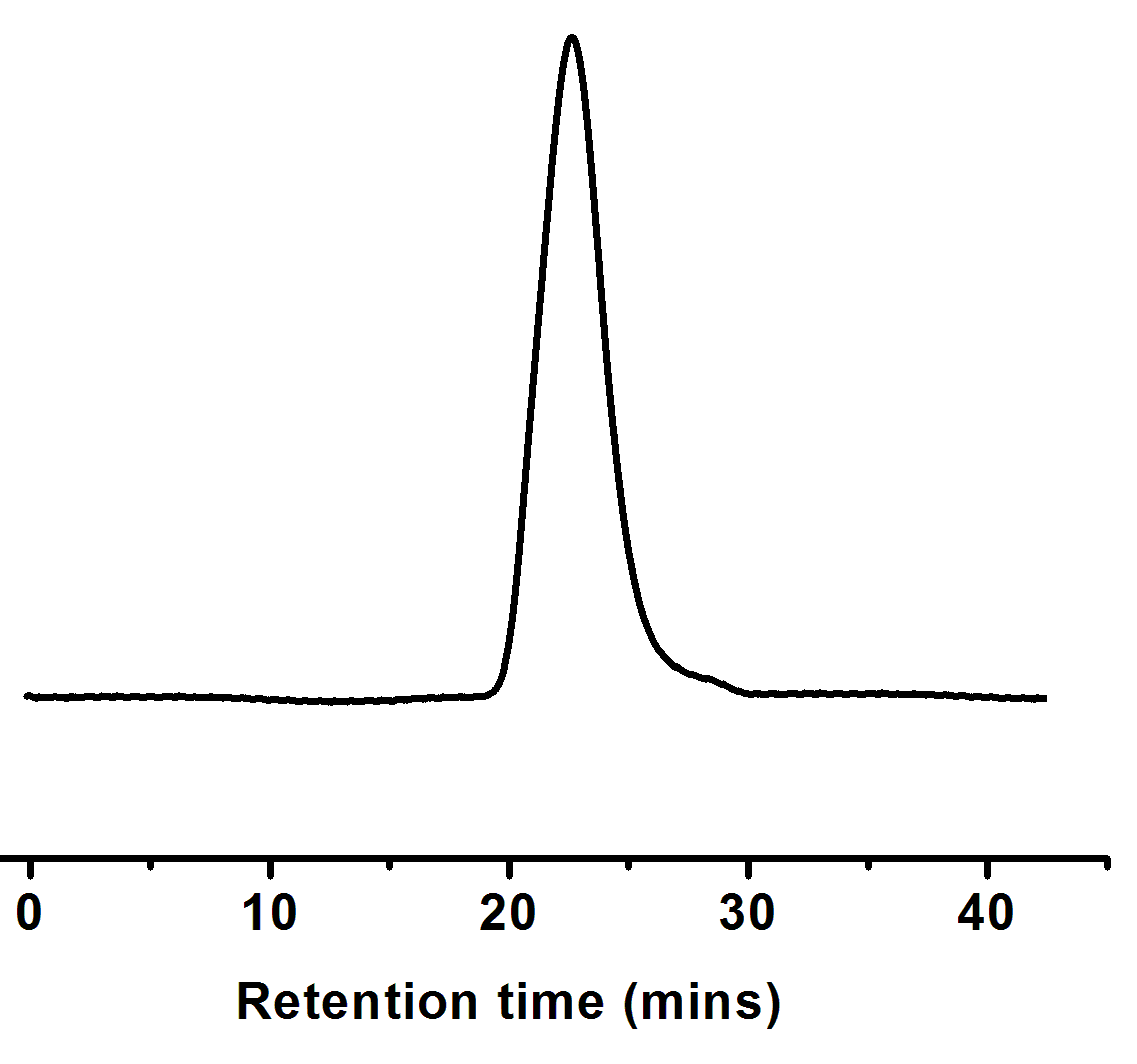


Fig. S1 GPC curve of mPEG-PCL copolymers.


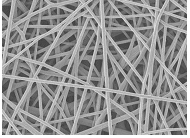


Fig. S2 SEM of Rsv-NFs


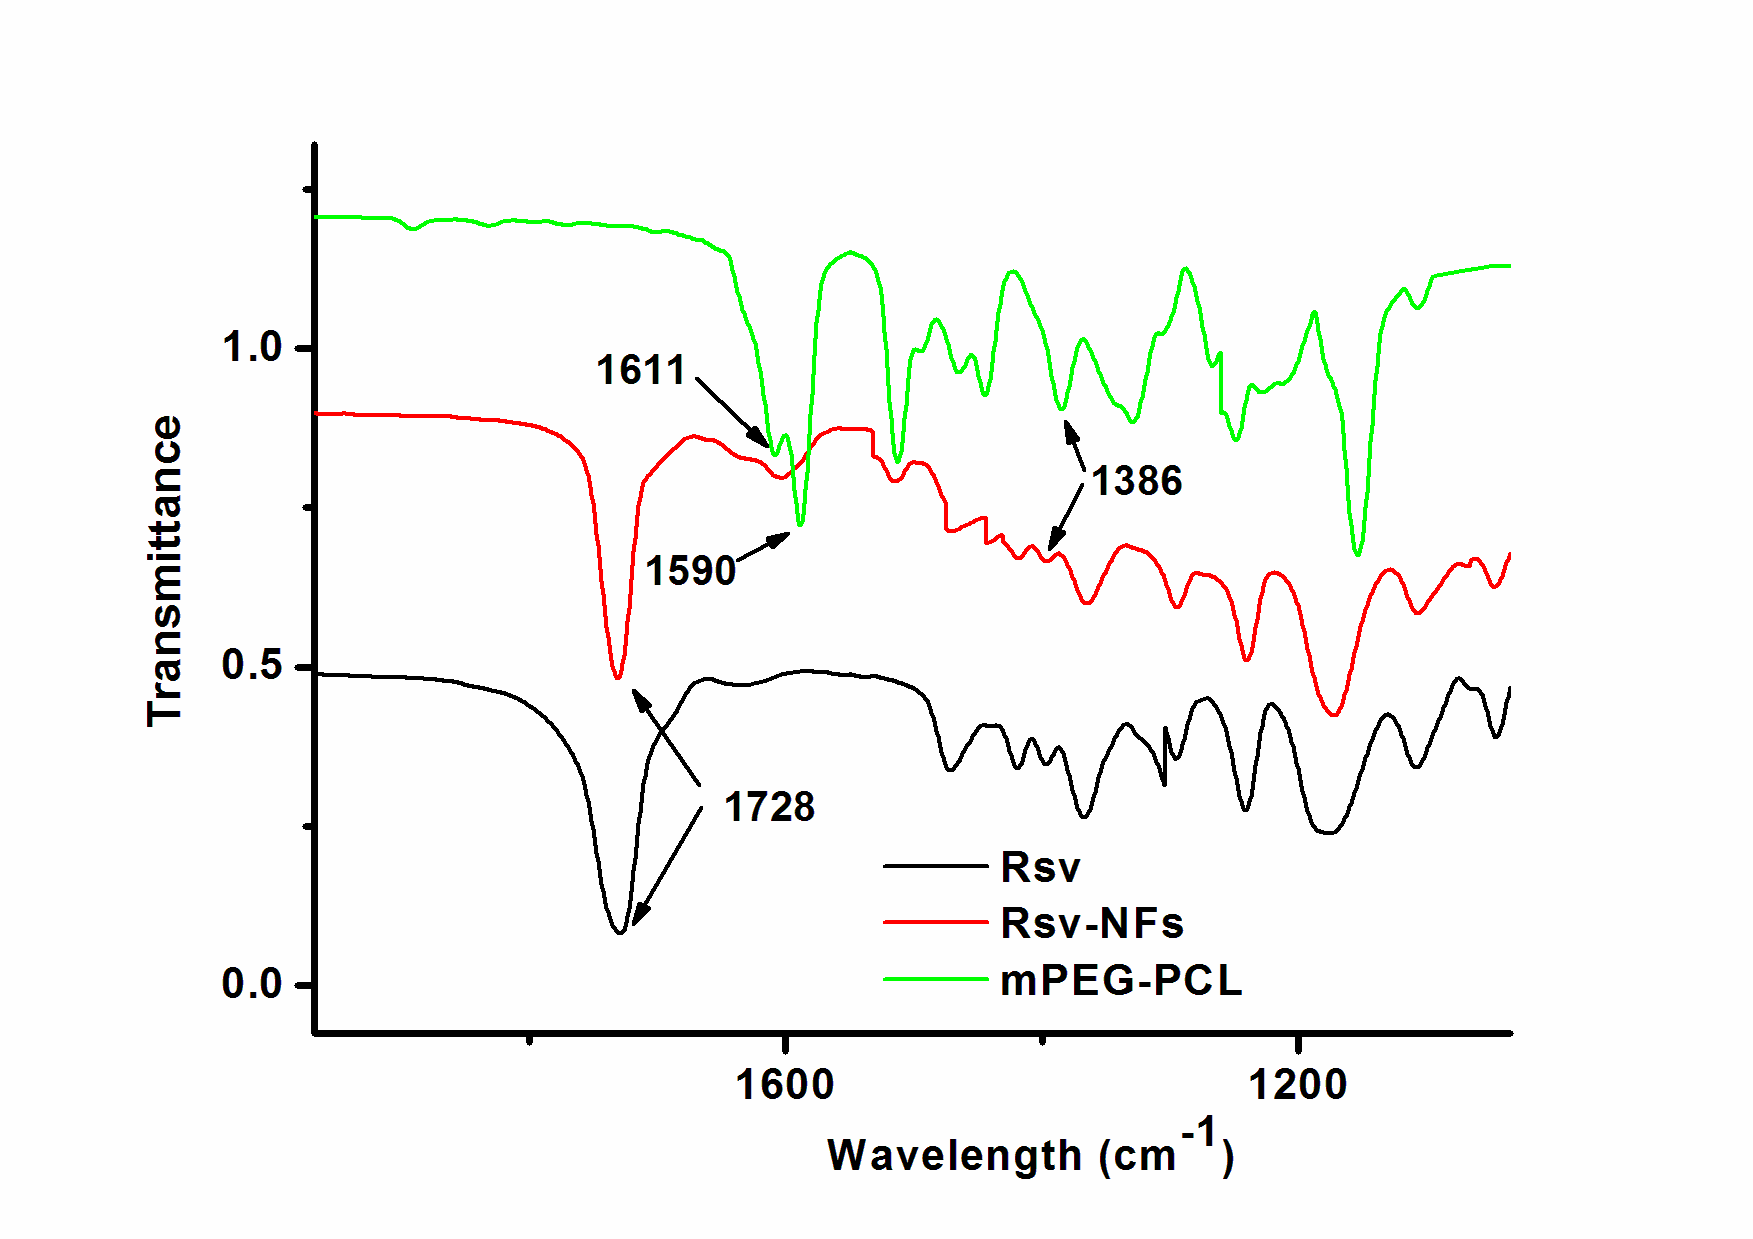


Fig. S3 FTIR spectrum of Rsv-NFs.


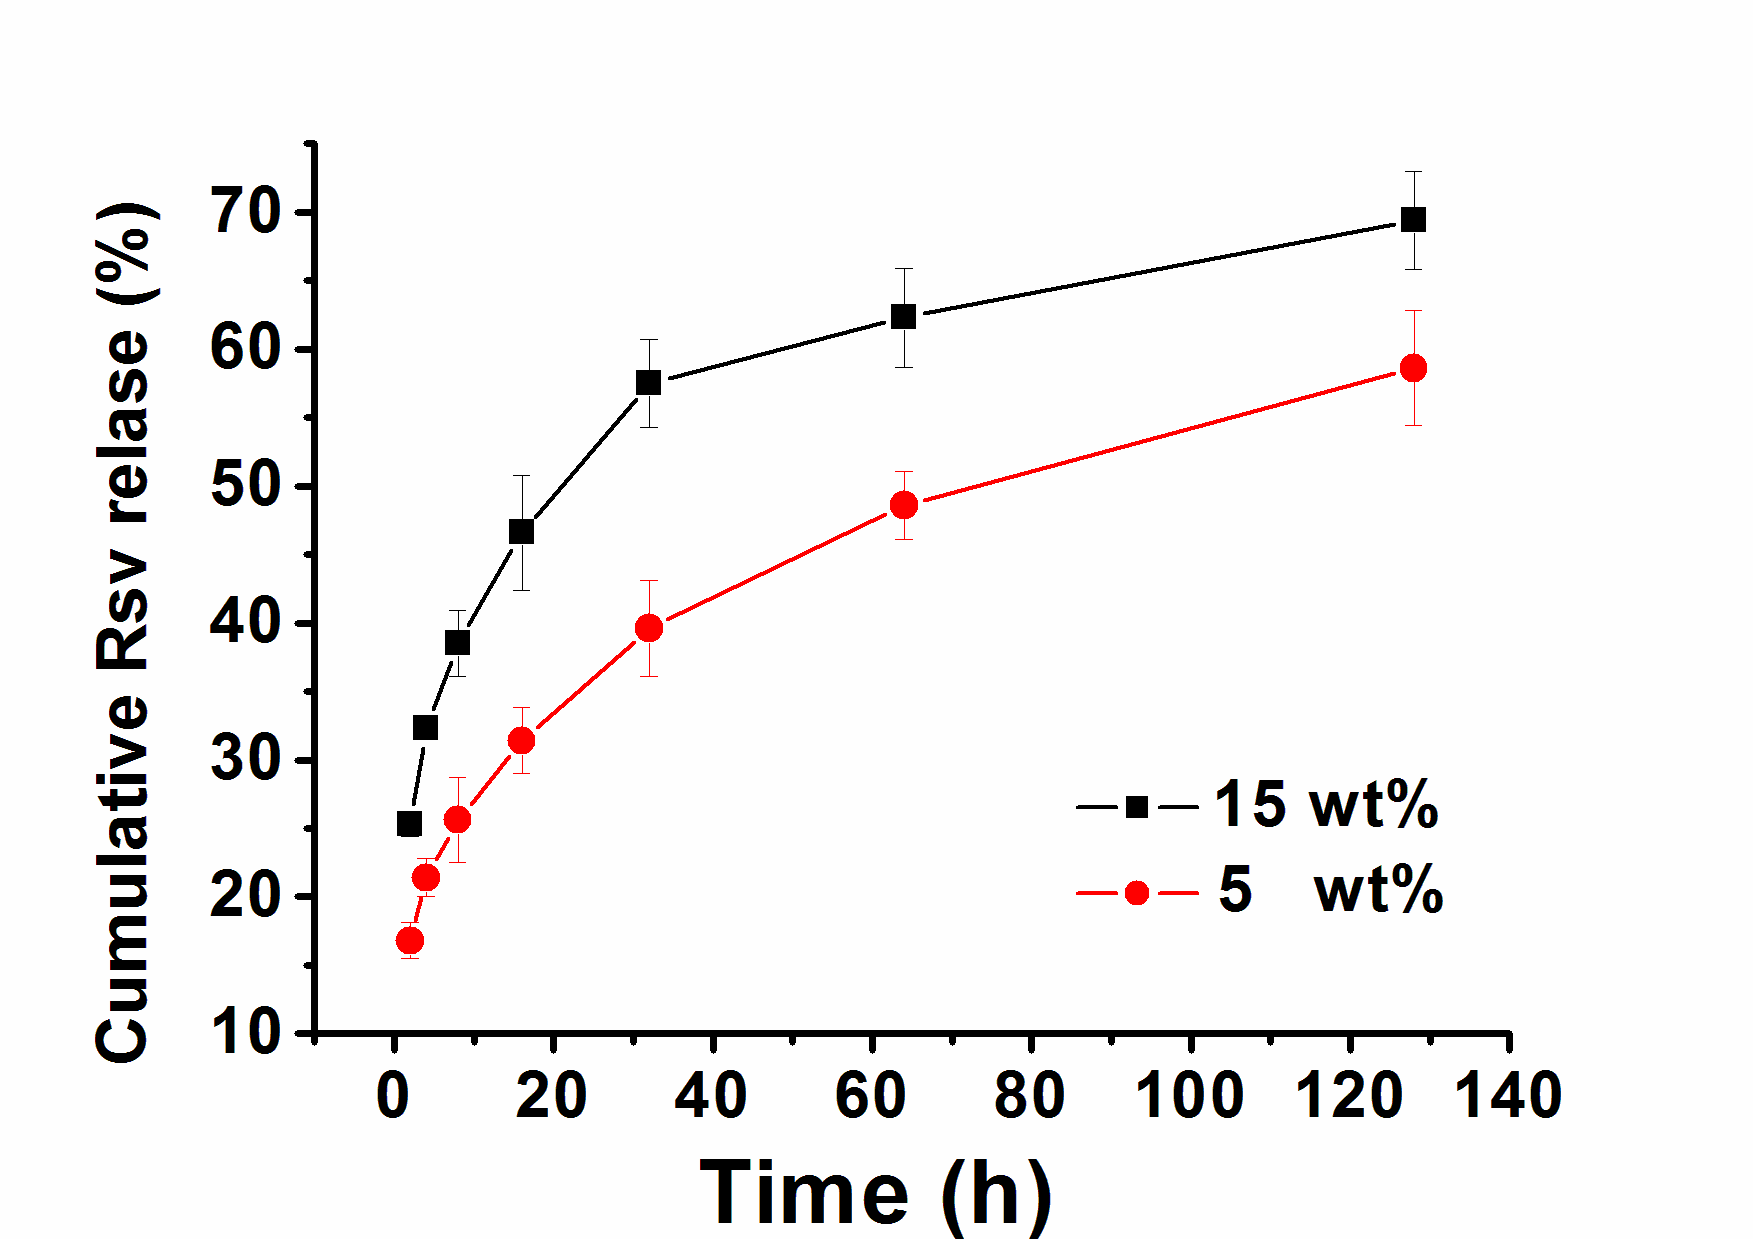


Fig. S4 In vitro release pattern of Rsv-NFs.
